# Supplementary material for: The Inconsistent Assessment of Quality of Life in Patients Treated for Head and Neck Cancer with Anti-EGFR Inhibitors: A Systematic Scoping Review
Source: MDPI journal article supplement (doi:10.3390/cancers15092475), 2023-04-26

Figure S1: Risk of bias summary: review authors' judgements about each risk of bias item for each included study.

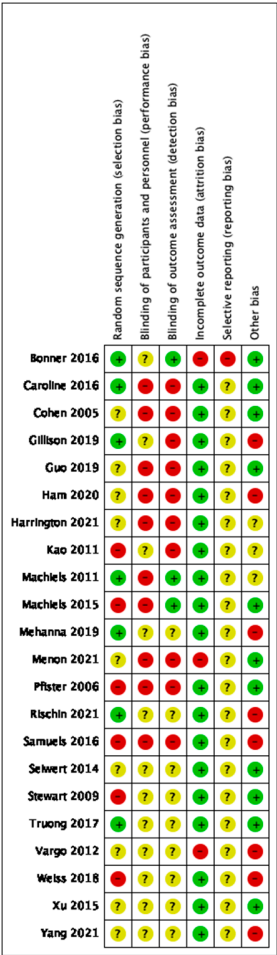

Figure S2: Risk of bias graph: review authors' judgements about each risk of bias item presented as percentages across all included studies.

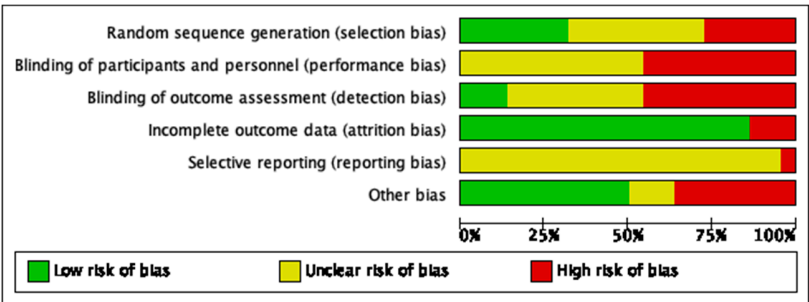

Supplement: s1 [file s1]
